# Supplementary material
Source: Springer Nature journal article supplement (https://www.springermedizin.de/resource/supplementary/13048_2008_3_MOESM5_ESM.pdf/9664700)

## Cell Migration

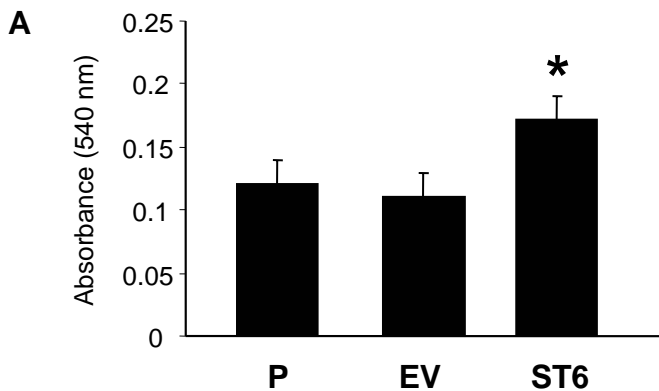

## Cell Invasion

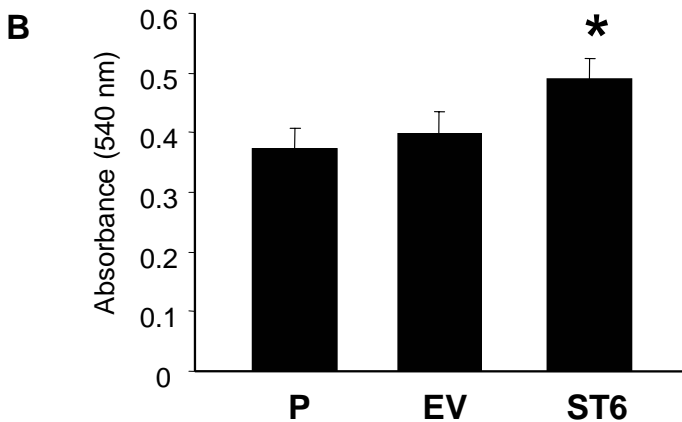

Supplement: MOESM5 [file 9664700]
